# Supplementary material for: Cryo-EM structures of GroEL:ES2 with RuBisCO visualize molecular contacts of encapsulated substrates in a double-cage chaperonin
Source: PubMed Central journal article supplement — iScience. 2021 Dec 27;25(1):103704. doi: 10.1016/j.isci.2021.103704 (PMC8749442; doi:10.1016/j.isci.2021.103704), 2021-12-27
Supplement: mmc1.pdf [file mmc1.pdf]

iScience, Volume 25

## **Supplemental information**

**Cryo-EM structures of GroEL:ES<sub>2</sub> with RuBisCO**

**visualize molecular contacts of encapsulated**

**substrates in a double-cage chaperonin**

**Hyunmin Kim, Junsun Park, Seyeon Lim, Sung-Hoon Jun, Mingyu Jung, and Soung-Hun Roh**

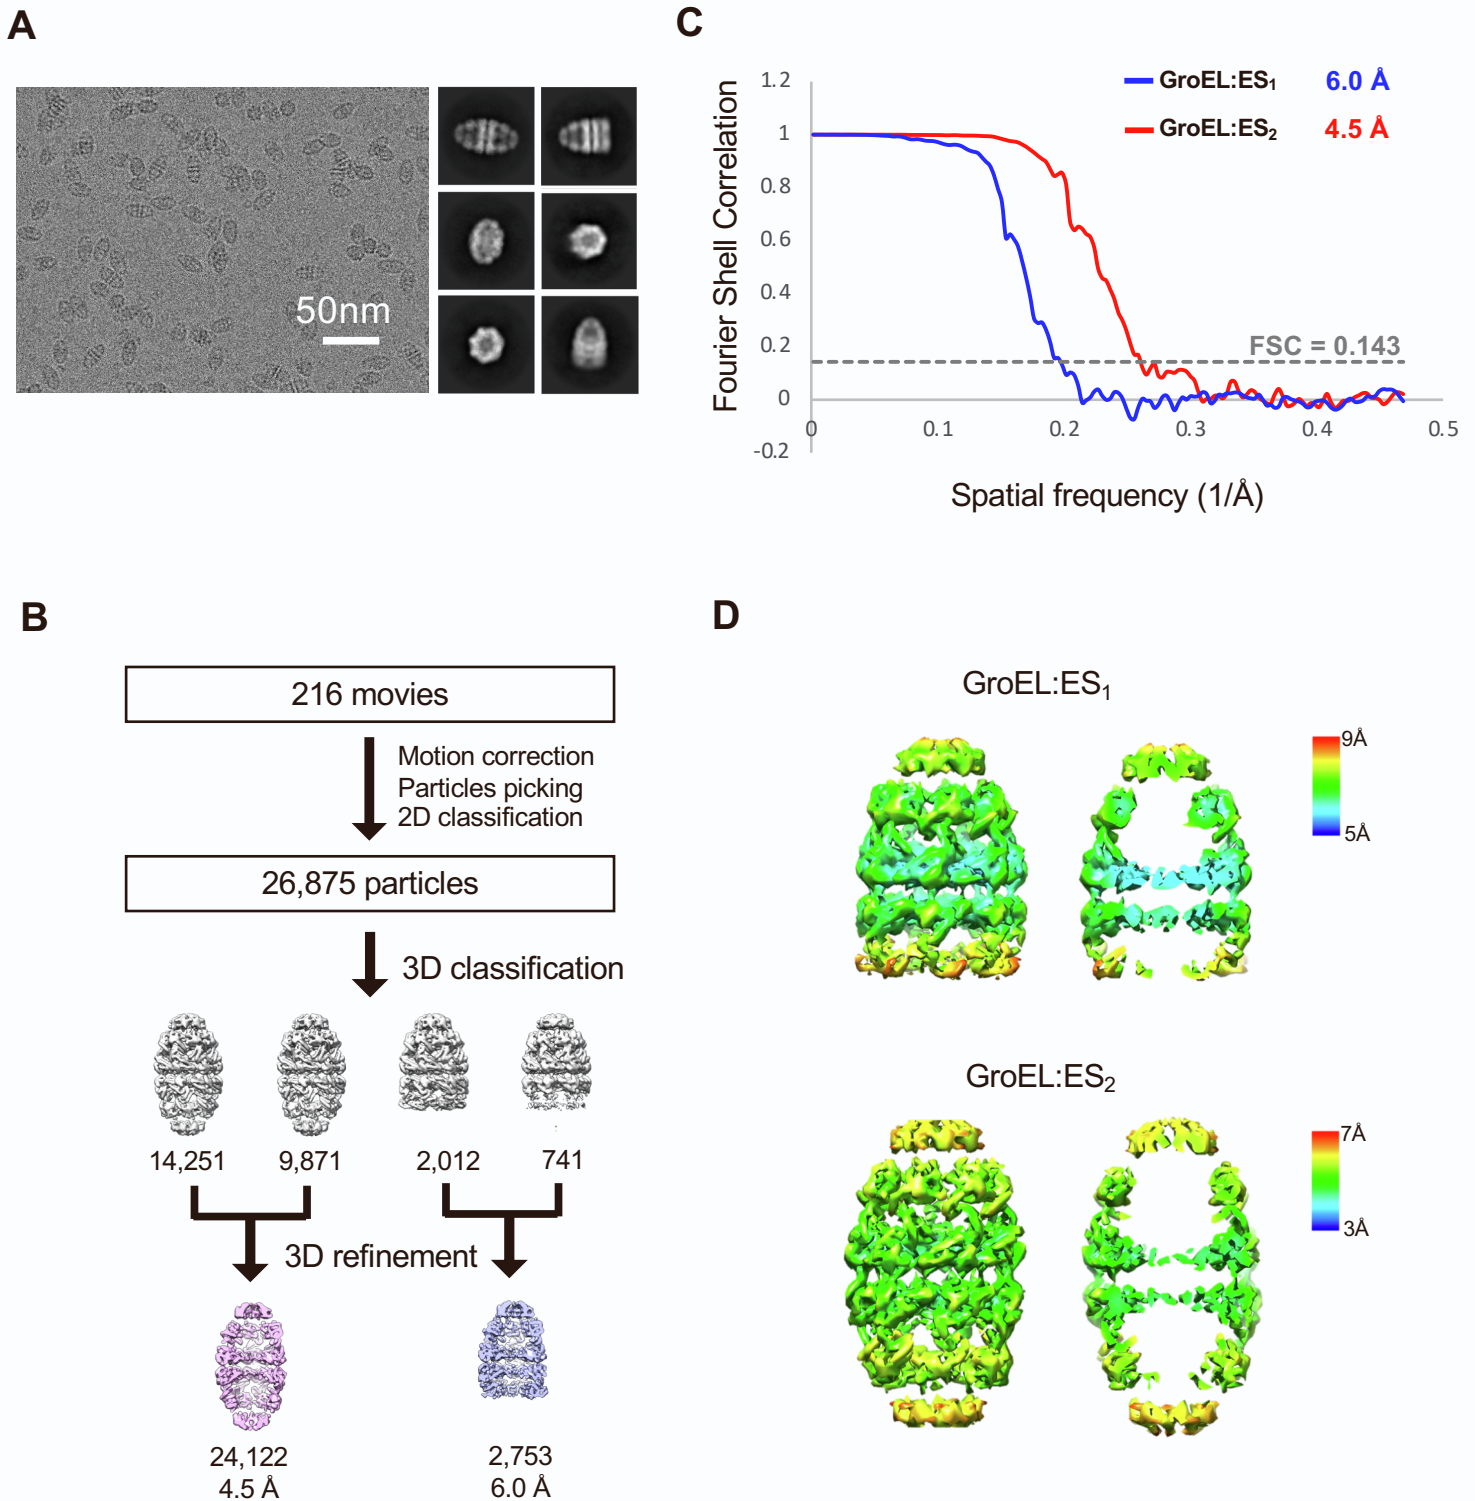

**Supplementary Figure 1. cryoEM data processing workflow for GroEL+GroES, related to Figure 1**

**A** Electron micrograph of ice-embedded GroEL+GroES. Scale bar, 50nm. Averaged 2D projections showing top, tilted and side views of bullet- and football-shaped complexes. **B** The data-processing workflow. **C** Gold-standard Fourier shell correlation (GS-FSC) curves depicting the resolution. **D** Local resolution estimation of bullet and football forms.

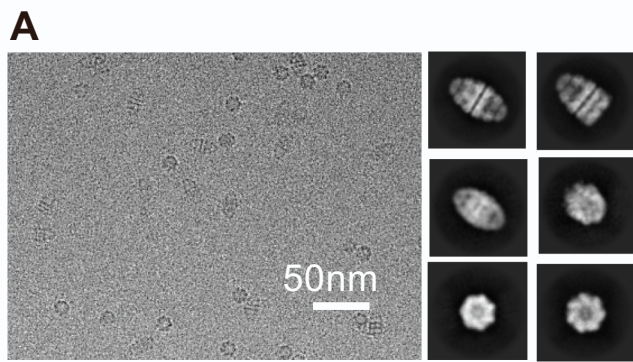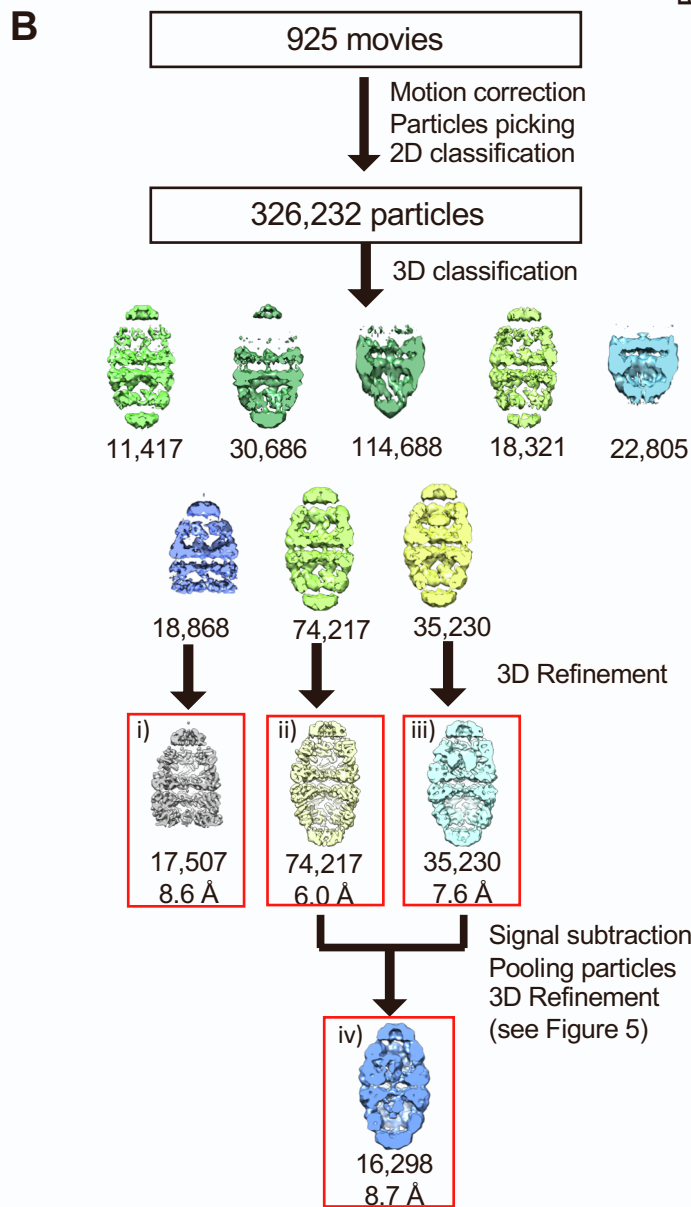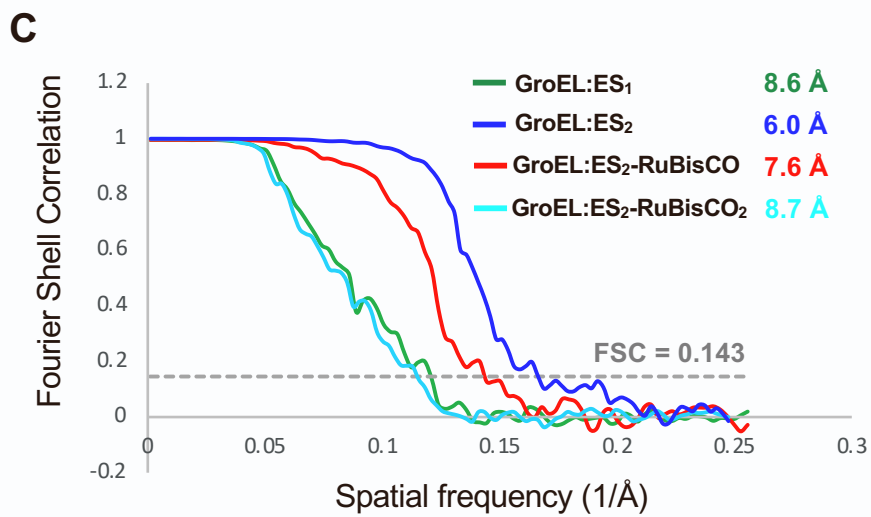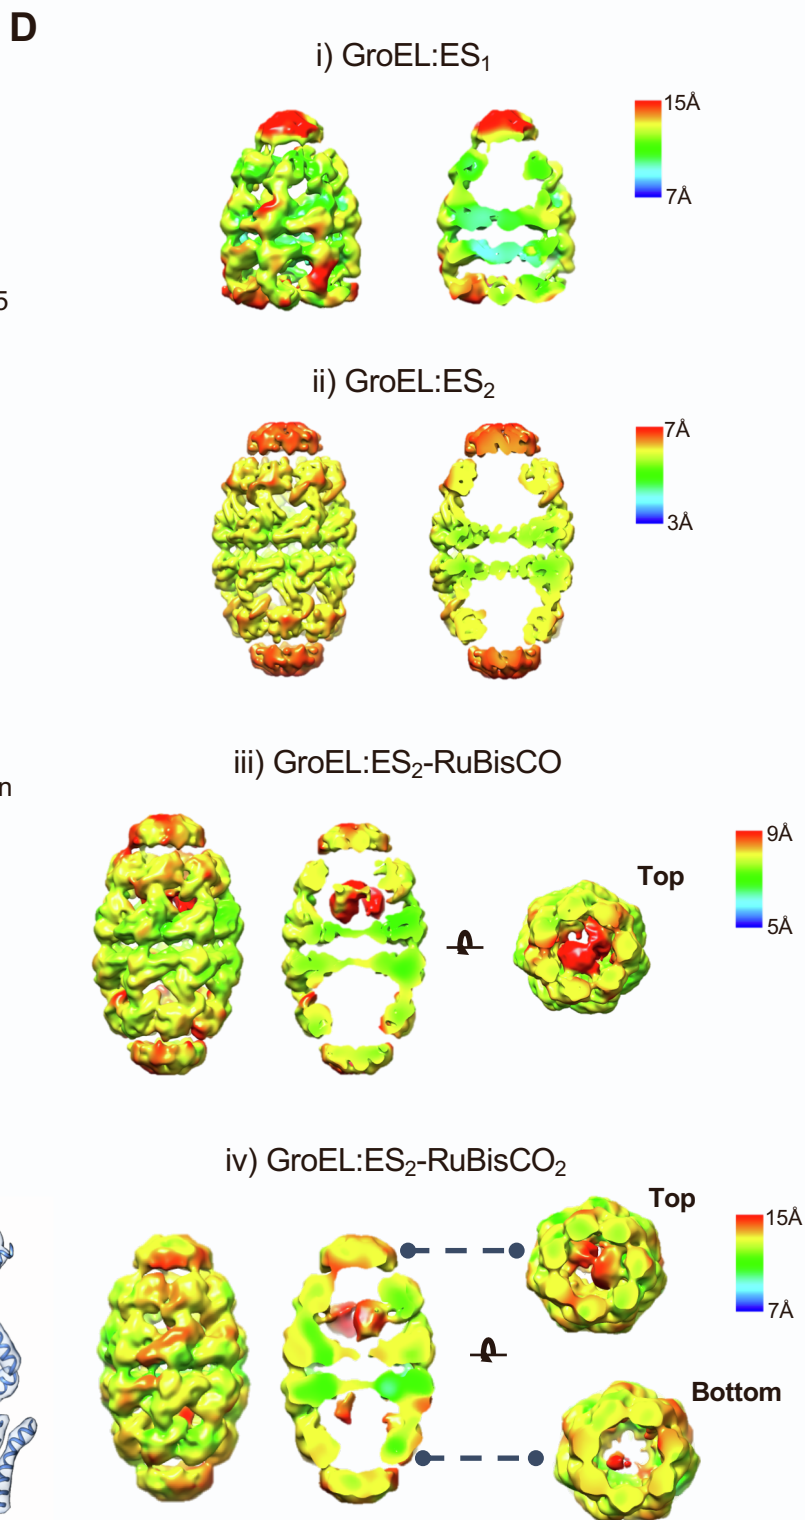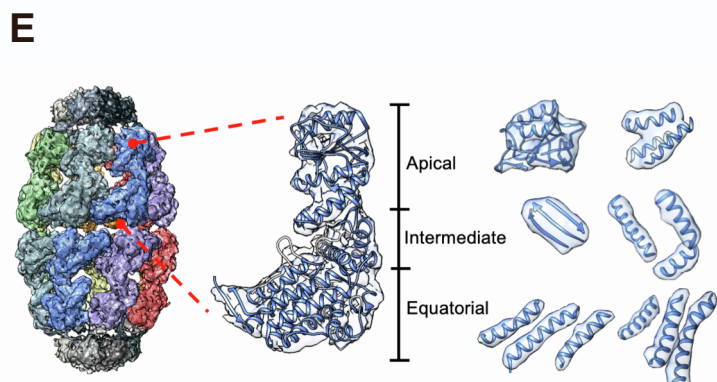

**Supplementary Figure 2. cryoEM data processing workflow for GroEL+GroES with RuBisCO, related to Figure 1**

**A** Electron micrograph of ice-embedded GroEL+GroES with RuBisCO. Scale bar, 50nm. Averaged 2D projections showing side, tilted and top views of football and bullet forms.

**B** The data-processing workflow. 326,232 particles were subjected to 3D classification after motion correction and 2D classification. 3 out of 8 classes, i) GroEL:ES1, ii) GroEL:ES2, and iii) GroEL:ES2-RuBisCO were determined from the particles. iv) GroEL:ES2-RuBisCO2 was further refined from football-shaped complex after signal subtraction, pooling particles, and 3D refinement.

**C** Gold-standard Fourier shell correlation (GS-FSC) curves depicting the resolution.

**D** Local resolution estimation of each maps.

**E** Segmented GroEL subunit is shown as a representative for the quality of the map and model.

**A**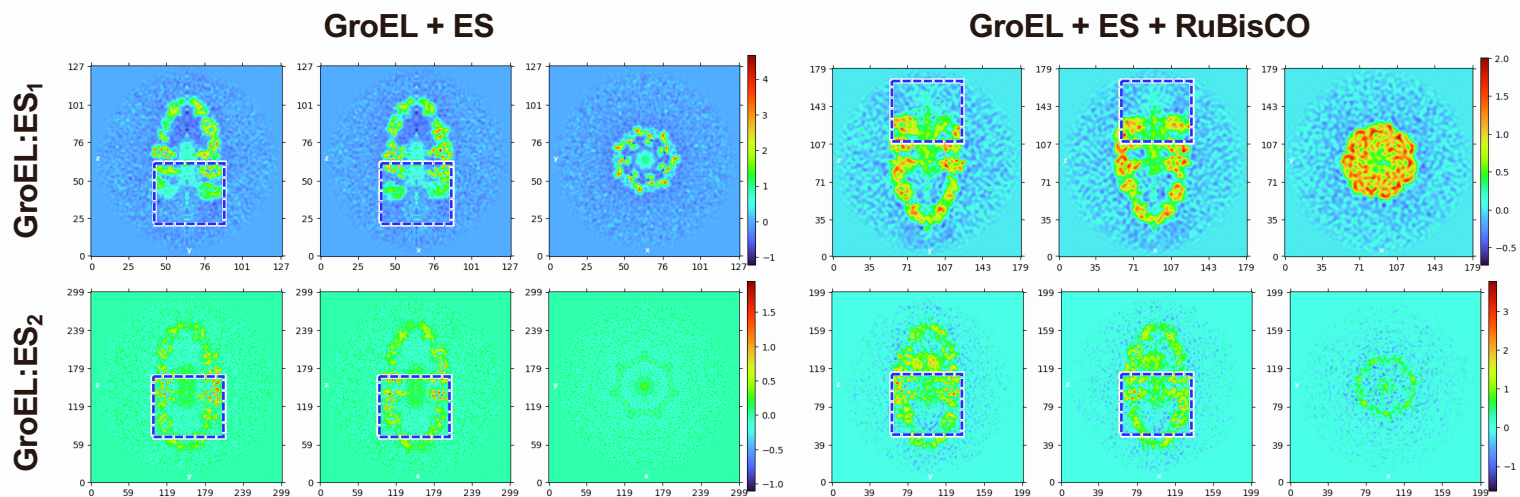**B**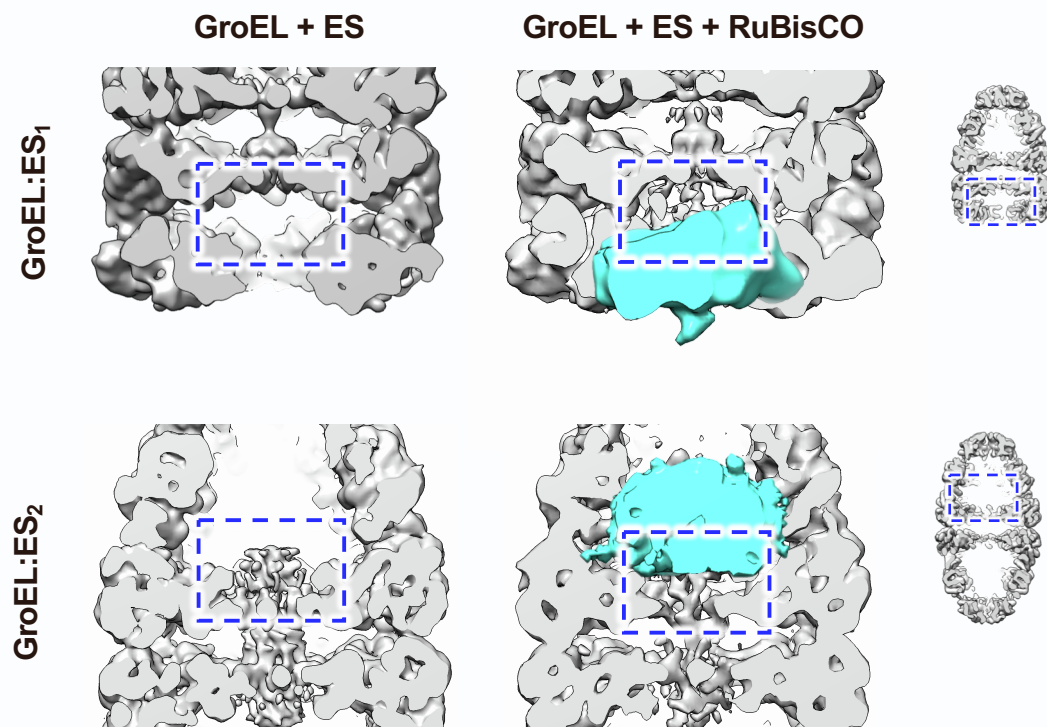

**Supplementary Figure 3. C-terminal tail inside the GroEL chamber, related to Figure 2. A** Real space slices view of various GroEL:ES complexes. **B** Focused view on C-terminal tail of each GroEL:ES complex. Extended C-terminal tails are visualized except for bullet-shaped GroEL:ES complex without RuBisCO.

**A**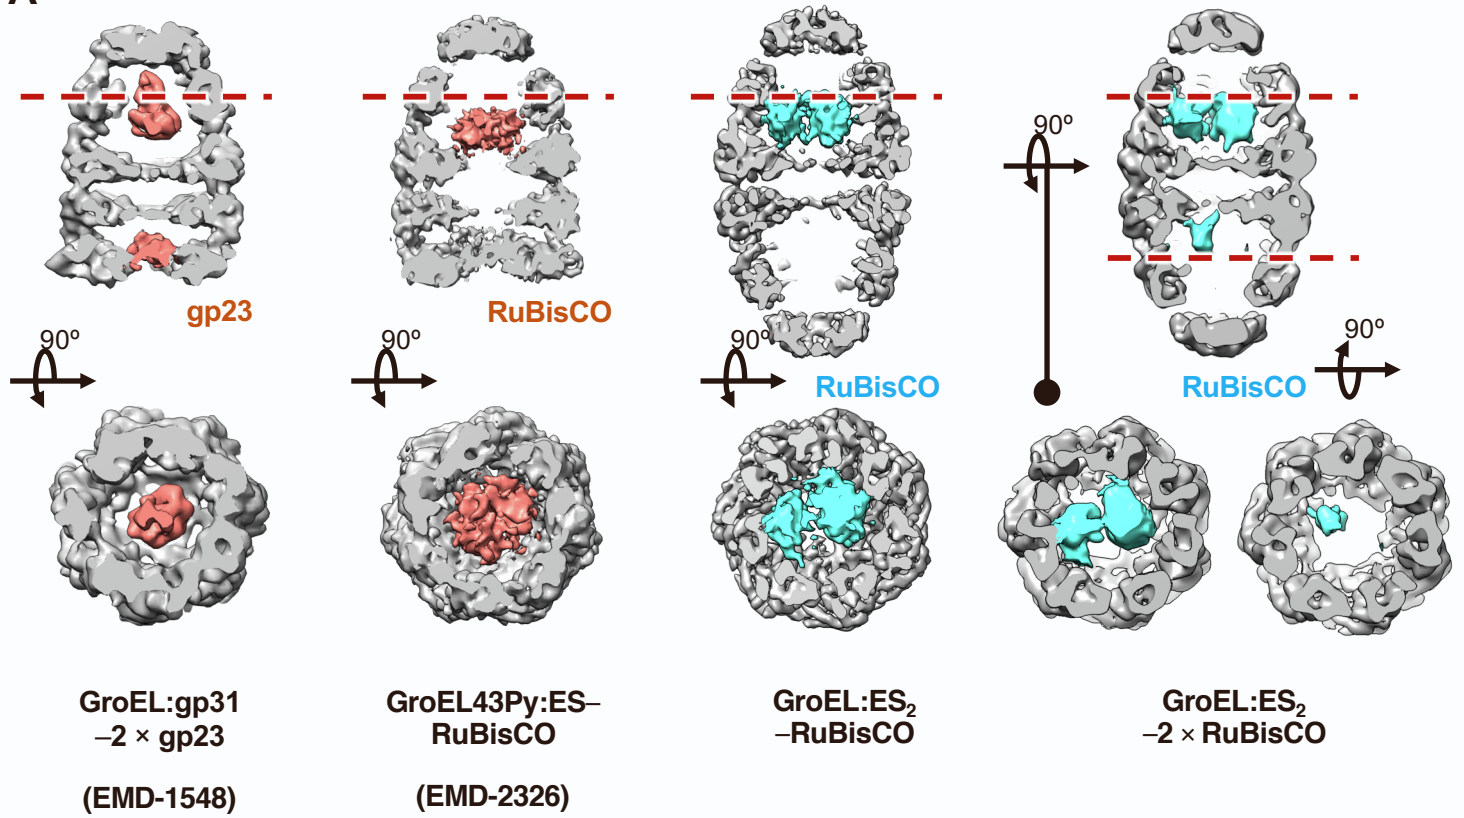

**Supplementary Figure 4. Comparison of structures of GroEL/ES chaperone encapsulating substrate inside its chamber, related to Figure 2. A Structures of GroEL, whose chamber is bound to substrates and is sealed with its lid-like domain GroES, are shown.**

**A**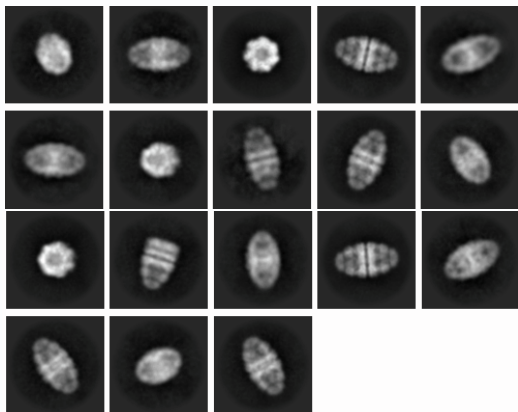**B**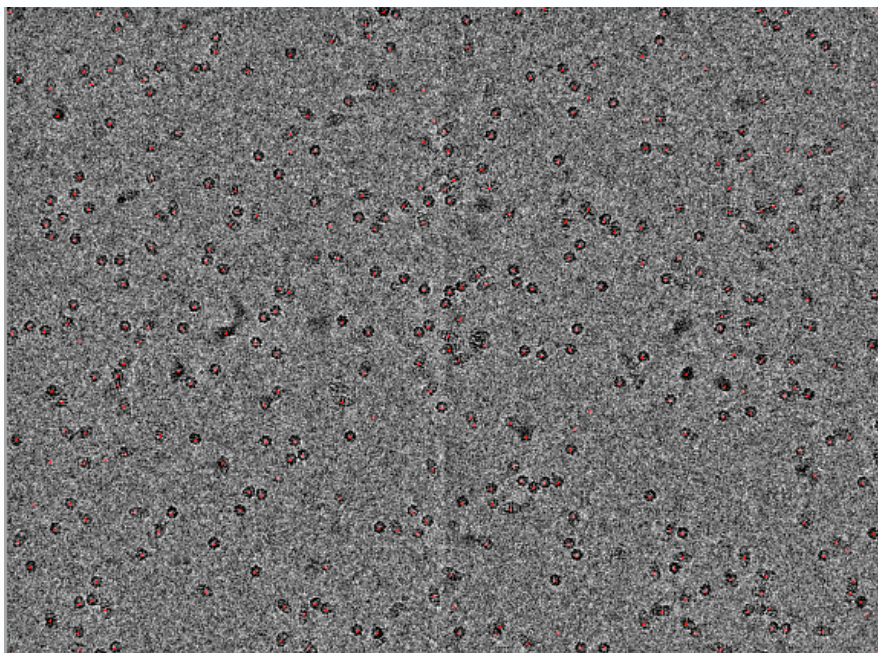

**Supplementary Figure 5. Automatic particle picking from templates generated, related to Figure 1. A** Templates generated from picked particles. **B** particles automatically picked on electron micrograph using generated templates.

**Table S1.**

| EMDB code (resolution)                    | EMD-1548  | EMD-2326   | GroEL:ES2-<br>RuBisCO | GroEL:ES2-<br>2 * RuBisCO |
|-------------------------------------------|-----------|------------|-----------------------|---------------------------|
| <b>Resolution</b>                         | 10.1 Å    | 9.2 Å      | 7.6 Å                 | 8.7 Å                     |
| <b>Substrate</b>                          | gp23      | RuBisCO    |                       | RuBisCO                   |
| <b>GroEL:GroES<br/>(input)</b>            | 1:2.5*    | 1:1        |                       | 1:2                       |
| <b>GroEL:GroES<br/>(in structure)</b>     | 1:1*      | 1:1        |                       | 1:2                       |
| <b>GroEL:Substrate (input)</b>            | 1:2       | 1:1        |                       | 1:10                      |
| <b>GroEL:Substrate (in<br/>structure)</b> | 1:2       | 1:1        | 1:1                   | 1:2                       |
| <b>GroEL Construct</b>                    | Wild-type | EL43Py398A |                       | Wild-type                 |
| <b>Used ATP analog</b>                    | ADP-AIFx  | ATP        |                       | ADP-BeFx                  |
| <b>Released year</b>                      | 2009      | 2013       |                       | 2021                      |

\*This structure used viral protein gp31 instead of GroES

**Supplementary Table 1, related to Figure 2. List of structures of GroEL/ES chaperone with substrates encapsulated.**
